# Supplementary material for: Determination of the isotopic composition of copper in a certified reference material HICU-1 by MC-ICP-MS using gravimetric isotope mixture calibration
Source: Royal Society of Chemistry journal article supplement (doi:10.1039/d3ja00212h), 2023-01-01
Supplement: d3ja00212h1.xlsx [file d3ja00212h1.xlsx]

## Sheet: 1_measurements
date	set_id	analysis_id	measurement_id	sample_id	mcicpms_cup_config	63Cu	64Zn	65Cu	66Zn	64Zn/66Zn	u_64Zn/66Zn	63Cu/65Cu	u_63Cu/65Cu		drift_Cu	63Cu/65Cu_corr
2020-Dec-08	set-1	1	1	blank1	L3(63), L2(64), L1(65), C(66)	0.00282138	0.00381472	0.0013813	0.00226418
2020-Dec-08	set-1	1	2	AB1-1	L3(63), L2(64), L1(65), C(66)	16.1727	0.0017419	16.3631	0.00104589	1.70142		0.988276	1.30601e-05		1	0.988276
2020-Dec-08	set-1	1	3	A	L3(63), L2(64), L1(65), C(66)	31.7142	0.00181071	0.0505149	0.00105588	1.65854		645.411	0.598103		0.999954	645.382
2020-Dec-08	set-1	1	4	B	L3(63), L2(64), L1(65), C(66)	0.10763	0.00171222	32.7291	0.00107247	1.76427		0.00320244	4.43606e-06		0.999909	0.00320215
2020-Dec-08	set-1	1	5	AB1b	L3(63), L2(64), L1(65), C(66)	16.2228	0.00173303	16.1763	0.00104984	1.71425		1.00279	1.40513e-05		0.999863	1.00265
2020-Dec-08	set-1	1	6	HICU-1	L3(63), L2(64), L1(65), C(66)	22.5978	0.00208566	10.6475	0.00124463	1.69591		2.12237	8.6634e-05		0.999818	2.12198
2020-Dec-08	set-1	1	7	NIST976	L3(63), L2(64), L1(65), C(66)	21.5873	0.0021227	10.1718	0.00126153	1.68754		2.12228	4.68578e-05		0.999772	2.12179
2020-Dec-08	set-1	1	8	AB1-2	L3(63), L2(64), L1(65), C(66)	16.2514	0.00189198	16.4382	0.00113499	1.70277		0.988546	7.2147e-05		0.999727	0.988276
2020-Dec-08	set-1	1	9	AB2	L3(63), L2(64), L1(65), C(66)	19.3951	0.00179519	13.1053	0.00107336	1.69592		1.47988	2.94675e-05		0.999772	1.47955
2020-Dec-08	set-1	1	10	AB3	L3(63), L2(64), L1(65), C(66)	21.8907	0.0023735	10.5474	0.00141282	1.69284		2.07546	8.58721e-05		0.999818	2.07508
2020-Dec-08	set-1	1	11	AB4	L3(63), L2(64), L1(65), C(66)	26.4174	0.001959	5.66724	0.00115805	1.67767		4.66206	0.000145511		0.999864	4.66143
2020-Dec-08	set-1	1	12	AB5	L3(63), L2(64), L1(65), C(66)	28.7898	0.00360037	3.2691	0.00212609	1.55223		8.8095	0.000197987		0.999909	8.8087
2020-Dec-08	set-1	1	13	AB6	L3(63), L2(64), L1(65), C(66)	31.0644	0.00327452	0.688455	0.00193639	1.69187		45.2085	0.00211319		0.999955	45.2065
2020-Dec-08	set-1	1	14	AB1-3	L3(63), L2(64), L1(65), C(66)	16.0604	0.00216841	16.2494	0.00130995	1.72528		0.988275	2.69377e-05		1	0.988276
2020-Dec-08	set-1	1	15	AB7	L3(63), L2(64), L1(65), C(66)	13.465	0.00214679	18.2187	0.00129649	1.72361		0.738977	8.92681e-06		1.00001	0.738984
2020-Dec-08	set-1	1	16	AB8	L3(63), L2(64), L1(65), C(66)	10.6424	0.00355511	21.5929	0.00214522	2.18237		0.492768	1.15818e-05		1.00002	0.492777
2020-Dec-08	set-1	1	17	AB9	L3(63), L2(64), L1(65), C(66)	5.39599	0.00234877	25.637	0.00143804	1.77445		0.210378	3.2669e-05		1.00003	0.210384
2020-Dec-08	set-1	1	18	AB10	L3(63), L2(64), L1(65), C(66)	3.24378	0.00236374	29.8889	0.00145669	1.79692		0.108438	4.88536e-06		1.00004	0.108443
2020-Dec-08	set-1	1	19	AB11	L3(63), L2(64), L1(65), C(66)	0.691626	0.0024271	30.8363	0.00149697	1.80865		0.0223385	1.54768e-06		1.00005	0.0223396
2020-Dec-08	set-1	1	20	AB1-4	L3(63), L2(64), L1(65), C(66)	15.9258	0.00261979	16.1142	0.00157345	1.72996		0.988219	2.07888e-05		1.00006	0.988276
2020-Dec-08	set-1	1	21	blank2	L3(63), L2(64), L1(65), C(66)	0.00246086	0.00421741	0.00149028	0.00250883
2020-Dec-10	set-1	2	1	blank1	L3(63), L2(64), L1(65), C(66)	0.00364535	0.00300856	0.00181969	0.00178899
2020-Dec-10	set-1	2	2	blank1	L3(63), L2(64), L1(65), C(66)	0.0100749	0.00300856	0.00656936	0.00178899
2020-Dec-10	set-1	2	3	HIZN-1	L3(63), L2(64), L1(65), C(66)	0.0100749	43.4927	0.00656936	25.8492
2020-Dec-10	set-1	2	4	AB1-1	L3(63), L2(64), L1(65), C(66)	18.2891	45.2573	18.4751	26.8973	1.6826	3.52912e-05	0.989737	2.50521e-05		1	0.989737
2020-Dec-10	set-1	2	5	A	L3(63), L2(64), L1(65), C(66)	36.091	46.3918	0.0626808	27.5698	1.68271	6.30095e-05	643.024	0.521049		0.999889	642.952
2020-Dec-10	set-1	2	6	B	L3(63), L2(64), L1(65), C(66)	0.128112	44.8612	36.7804	26.6559	1.68297	8.7293e-05	0.0032098	3.33075e-06		0.999778	0.00320909
2020-Dec-10	set-1	2	7	AB1b	L3(63), L2(64), L1(65), C(66)	18.2935	44.5157	18.2091	26.4483	1.68312	8.71055e-05	1.00444	4.55627e-05		0.999667	1.00411
2020-Dec-10	set-1	2	8	HICU-1	L3(63), L2(64), L1(65), C(66)	25.4322	45.2469	11.9644	26.8787	1.68337	9.19773e-05	2.12598	0.000299617		0.999556	2.12504
2020-Dec-10	set-1	2	9	NIST976	L3(63), L2(64), L1(65), C(66)	24.2596	44.6371	11.4115	26.5125	1.68363	4.52729e-05	2.12624	4.87639e-05		0.999445	2.12506
2020-Dec-10	set-1	2	10	AB1-2	L3(63), L2(64), L1(65), C(66)	18.2294	44.9179	18.4025	26.6764	1.68381	7.81469e-05	0.990397	3.41464e-05		0.999334	0.989737
2020-Dec-10	set-1	2	11	AB2	L3(63), L2(64), L1(65), C(66)	21.7738	44.3221	14.682	26.32	1.68397	7.74438e-05	1.48301	6.01376e-05		0.999282	1.48194
2020-Dec-10	set-1	2	12	AB3	L3(63), L2(64), L1(65), C(66)	24.7867	45.0301	11.9187	26.7399	1.68401	2.45997e-05	2.07995	2.31144e-05		0.99923	2.07835
2020-Dec-10	set-1	2	13	AB4	L3(63), L2(64), L1(65), C(66)	30.0782	45.4102	6.4416	26.9637	1.68412	2.68434e-05	4.67257	0.000528086		0.999178	4.66873
2020-Dec-10	set-1	2	14	AB5	L3(63), L2(64), L1(65), C(66)	32.839	44.7432	3.72425	26.5666	1.68419	3.86171e-05	8.83049	0.000267841		0.999126	8.82277
2020-Dec-10	set-1	2	15	AB6	L3(63), L2(64), L1(65), C(66)	35.5628	46.4229	0.791266	27.5626	1.69187	3.63716e-05	45.3076	0.0233227		0.999074	45.2657
2020-Dec-10	set-1	2	16	AB1-3	L3(63), L2(64), L1(65), C(66)	18.5664	45.8591	18.737	27.2277	1.68428	3.95866e-05	0.990707	3.7908e-05		0.999022	0.989737
2020-Dec-10	set-1	2	17	AB7	L3(63), L2(64), L1(65), C(66)	15.5291	45.416	20.9559	26.9641	1.68432	4.17761e-05	0.740787	1.26997e-05		0.999003	0.740048
2020-Dec-10	set-1	2	18	AB8	L3(63), L2(64), L1(65), C(66)	12.2225	44.8935	24.7279	26.6525	1.6844	3.1096e-05	0.494004	1.0703e-05		0.998984	0.493502
2020-Dec-10	set-1	2	19	AB9	L3(63), L2(64), L1(65), C(66)	6.19388	44.0436	29.3299	26.1474	1.68444	5.28176e-05	0.210883	7.64333e-06		0.998965	0.210665
2020-Dec-10	set-1	2	20	AB10	L3(63), L2(64), L1(65), C(66)	3.73197	44.6052	34.2467	26.4798	1.6845	2.81885e-05	0.1087	2.55798e-06		0.998946	0.108585
2020-Dec-10	set-1	2	21	AB11	L3(63), L2(64), L1(65), C(66)	0.796419	45.1388	35.1274	26.7954	1.68457	3.38466e-05	0.0223897	1.89992e-06		0.998927	0.0223656
2020-Dec-10	set-1	2	22	AB1-4	L3(63), L2(64), L1(65), C(66)	18.1864	44.8158	18.3513	26.6029	1.68462	2.49679e-05	0.990819	2.66634e-05		0.998908	0.989737
2020-Dec-10	set-1	2	23	blank2	L3(63), L2(64), L1(65), C(66)	0.00296983	0.00412093	0.00173004	0.00246536
2021-Jan-14	set-1	3	1	blank1	L3(63), L2(64), L1(65), C(66)	0.00291115	0.00427283	0.00156841	0.0024962
2021-Jan-14	set-1	3	2	AB1-1	L3(63), L2(64), L1(65), C(66)	22.7083	0.00318316	22.8994	0.00188376	1.77925		0.991594	1.30601e-05		1	0.991594
2021-Jan-14	set-1	3	3	A	L3(63), L2(64), L1(65), C(66)	44.0769	0.00229605	0.0698477	0.00130546	1.66014		645.496	0.598103		1.00018	645.615
2021-Jan-14	set-1	3	4	B	L3(63), L2(64), L1(65), C(66)	0.146089	0.00217496	44.4388	0.00135993	1.84628		0.00322204	4.43606e-06		1.00037	0.00322323
2021-Jan-14	set-1	3	5	AB1b	L3(63), L2(64), L1(65), C(66)	21.7355	0.00213107	21.6187	0.00127481	1.75356		1.00534	1.40513e-05		1.00055	1.0059
2021-Jan-14	set-1	3	6	HICU-1	L3(63), L2(64), L1(65), C(66)	30.114	0.00267409	14.1575	0.00157383	1.73331		2.1271	8.6634e-05		1.00074	2.12867
2021-Jan-14	set-1	3	7	NIST976	L3(63), L2(64), L1(65), C(66)	27.7211	0.00267662	13.0332	0.00157556	1.73381		2.12699	4.68578e-05		1.00092	2.12896
2021-Jan-14	set-1	3	8	AB1-2	L3(63), L2(64), L1(65), C(66)	20.5432	0.00349664	20.739	0.00208934	1.90777		0.990498	7.2147e-05		1.00111	0.991594
2021-Jan-14	set-1	3	9	AB2	L3(63), L2(64), L1(65), C(66)	24.3127	0.00259166	16.3955	0.00153907	1.75648		1.48285	2.94675e-05		1.00118	1.4846
2021-Jan-14	set-1	3	10	AB3	L3(63), L2(64), L1(65), C(66)	27.2704	0.0032752	13.1142	0.00193905	1.79062		2.07948	8.58721e-05		1.00125	2.08209
2021-Jan-14	set-1	3	11	AB4	L3(63), L2(64), L1(65), C(66)	32.897	0.00267391	7.0439	0.00157001	1.72635		4.67091	0.000145511		1.00133	4.67711
2021-Jan-14	set-1	3	12	AB5	L3(63), L2(64), L1(65), C(66)	35.4601	0.00403885	4.01904	0.00236757	1.81904		8.82576	0.000197987		1.0014	8.83812
2021-Jan-14	set-1	3	13	AB6	L3(63), L2(64), L1(65), C(66)	38.152	0.00500774	0.843751	0.00291334	1.69187		45.2979	0.00211319		1.00147	45.3647
2021-Jan-14	set-1	3	14	AB1-3	L3(63), L2(64), L1(65), C(66)	19.5532	0.00429771	19.7481	0.00257052	0.334773		0.990061	2.69377e-05		1.00155	0.991594
2021-Jan-14	set-1	3	15	AB7	L3(63), L2(64), L1(65), C(66)	16.271	0.00315156	21.9792	0.00190332	1.89125		0.740208	8.92681e-06		1.00163	0.741417
2021-Jan-14	set-1	3	16	AB8	L3(63), L2(64), L1(65), C(66)	12.7277	0.00546038	25.781	0.0032766	1.52171		0.493604	1.15818e-05		1.00172	0.494452
2021-Jan-14	set-1	3	17	AB9	L3(63), L2(64), L1(65), C(66)	6.35802	0.00392127	30.1654	0.00239143	3.35577		0.210687	3.2669e-05		1.0018	0.211067
2021-Jan-14	set-1	3	18	AB10	L3(63), L2(64), L1(65), C(66)	3.80867	0.00398234	35.0469	0.00244348	5.51066		0.108596	4.88536e-06		1.00189	0.108801
2021-Jan-14	set-1	3	19	AB11	L3(63), L2(64), L1(65), C(66)	0.807932	0.00467113	35.9803	0.00284924	1.12819		0.022375	1.54768e-06		1.00198	0.0224192
2021-Jan-14	set-1	3	20	AB1-4	L3(63), L2(64), L1(65), C(66)	18.465	0.00569638	18.6585	0.00341305	1.55266		0.989554	2.07888e-05		1.00206	0.991594
2021-Jan-14	set-1	3	21	blank2	L3(63), L2(64), L1(65), C(66)	0.00254359	0.00653376	0.00155235	0.0038863
2021-Jan-27	set-1	4	1	blank1	L3(63), L2(64), L1(65), C(66)	0.00294727	0.00400655	0.00156401	0.00237494
2021-Jan-27	set-1	4	2	AB1-1	L3(63), L2(64), L1(65), C(66)	20.1897	0.00336274	20.3713	0.00200764	1.7528		0.991015	5.17638e-05		1	0.991015
2021-Jan-27	set-1	4	3	A	L3(63), L2(64), L1(65), C(66)	39.5754	0.00202036	0.0627674	0.00118099	1.66355		646.573	0.235229		0.999973	646.556
2021-Jan-27	set-1	4	4	B	L3(63), L2(64), L1(65), C(66)	0.133253	0.00303069	40.4422	0.00187351	1.94616		0.00322216	3.26144e-06		0.999946	0.00322198
2021-Jan-27	set-1	4	5	AB1b	L3(63), L2(64), L1(65), C(66)	20.025	0.0026044	19.9143	0.00157342	1.74936		1.00549	4.60844e-05		0.999919	1.00541
2021-Jan-27	set-1	4	6	HICU-1	L3(63), L2(64), L1(65), C(66)	28.697	0.00722748	13.485	0.00428743	1.68415		2.12809	3.76422e-05		0.999892	2.12786
2021-Jan-27	set-1	4	7	NIST976	L3(63), L2(64), L1(65), C(66)	26.5564	0.00246596	12.4793	0.00146674	1.69631		2.12807	8.57388e-05		0.999865	2.12779
2021-Jan-27	set-1	4	8	AB1-2	L3(63), L2(64), L1(65), C(66)	19.9482	0.00393707	20.1244	0.00236581	7.61681		0.991176	1.54497e-05		0.999838	0.991015
2021-Jan-27	set-1	4	9	AB2	L3(63), L2(64), L1(65), C(66)	23.8259	0.00235424	16.0541	0.00140773	1.70833		1.48407	6.8572e-05		0.999799	1.48377
2021-Jan-27	set-1	4	10	AB3	L3(63), L2(64), L1(65), C(66)	26.8801	0.00346961	12.9141	0.00207446	1.78694		2.08148	5.12314e-05		0.99976	2.08098
2021-Jan-27	set-1	4	11	AB4	L3(63), L2(64), L1(65), C(66)	32.6148	0.00290496	6.97584	0.00172896	1.7053		4.67602	0.000126138		0.999721	4.67472
2021-Jan-27	set-1	4	12	AB5	L3(63), L2(64), L1(65), C(66)	35.4982	0.00428929	4.01831	0.00254113	1.70129		8.8368	0.000262272		0.999682	8.83399
2021-Jan-27	set-1	4	13	AB6	L3(63), L2(64), L1(65), C(66)	38.2897	0.0052496	0.845655	0.00310285	1.69187		45.3585	0.0518506		0.999643	45.3423
2021-Jan-27	set-1	4	14	AB1-3	L3(63), L2(64), L1(65), C(66)	19.8294	0.00504224	19.9999	0.00302124	1.60248		0.991407	0.000108233		0.999605	0.991015
2021-Jan-27	set-1	4	15	AB7	L3(63), L2(64), L1(65), C(66)	16.6491	0.00341547	22.457	0.00206799	1.92563		0.741299	1.64006e-05		0.999628	0.741023
2021-Jan-27	set-1	4	16	AB8	L3(63), L2(64), L1(65), C(66)	13.1774	0.00600397	26.6506	0.0036128	1.6136		0.494371	1.58494e-05		0.999651	0.494198
2021-Jan-27	set-1	4	17	AB9	L3(63), L2(64), L1(65), C(66)	6.64213	0.004378	31.4647	0.00266838	1.26584		0.211015	4.23317e-06		0.999674	0.210946
2021-Jan-27	set-1	4	18	AB10	L3(63), L2(64), L1(65), C(66)	4.01666	0.00451692	36.9047	0.00275327	1.34899		0.108763	1.40854e-05		0.999698	0.10873
2021-Jan-27	set-1	4	19	AB11	L3(63), L2(64), L1(65), C(66)	0.860749	0.0053487	38.2649	0.00326729	1.50406		0.0224184	1.32878e-06		0.999721	0.0224121
2021-Jan-27	set-1	4	20	AB1-4	L3(63), L2(64), L1(65), C(66)	19.7159	0.0069534	19.8882	0.00416205	1.64894		0.991268	7.61978e-05		0.999744	0.991015
2021-Jan-27	set-1	4	21	blank2	L3(63), L2(64), L1(65), C(66)	0.0025246	0.00789392	0.0014367	0.00470702
2021-Feb-24	set-1	5	1	blank1	L3(63), L2(64), L1(65), C(66)	0.00317588	0.00713111	0.0016903	0.00425482
2021-Feb-24	set-1	5	2	AB1-1	L3(63), L2(64), L1(65), C(66)	17.6354	0.00632608	17.7926	0.00379189			0.991081	2.60697e-05		1	0.991081
2021-Feb-24	set-1	5	3	A	L3(63), L2(64), L1(65), C(66)	34.8132	0.00481255	0.0555927	0.00284311			645.797	1.80735		0.999955	645.768
2021-Feb-24	set-1	5	4	B	L3(63), L2(64), L1(65), C(66)	0.118541	0.00551432	35.6046	0.00334465			0.00324032	4.11853e-05		0.99991	0.00324003
2021-Feb-24	set-1	5	5	AB1b	L3(63), L2(64), L1(65), C(66)	17.745	0.00498468	17.6444	0.0029931			1.00562	3.09937e-05		0.999865	1.00548
2021-Feb-24	set-1	5	6	HICU-1	L3(63), L2(64), L1(65), C(66)	25.7812	0.00861566	12.1136	0.00512221			2.12831	5.57789e-05		0.99982	2.12793
2021-Feb-24	set-1	5	7	NIST976	L3(63), L2(64), L1(65), C(66)	23.9658	0.0046185	11.2605	0.00276094			2.12834	5.39505e-05		0.999775	2.12786
2021-Feb-24	set-1	5	8	AB1-2	L3(63), L2(64), L1(65), C(66)	17.8069	0.00606128	17.9608	0.00363219			0.991348	3.10823e-05		0.99973	0.991081
2021-Feb-24	set-1	5	9	AB2	L3(63), L2(64), L1(65), C(66)	21.2135	0.00405469	14.2917	0.00243479			1.48427	3.96665e-05		0.999664	1.48377
2021-Feb-24	set-1	5	10	AB3	L3(63), L2(64), L1(65), C(66)	23.9397	0.0048829	11.4999	0.00291567			2.08176	8.28618e-05		0.999598	2.08093
2021-Feb-24	set-1	5	11	AB4	L3(63), L2(64), L1(65), C(66)	27.5519	0.00396034	5.89072	0.00236224			4.67797	0.000120009		0.999532	4.67578
2021-Feb-24	set-1	5	12	AB5	L3(63), L2(64), L1(65), C(66)	30.0806	0.00492749	3.40411	0.0029224			8.84001	0.000225158		0.999466	8.83529
2021-Feb-24	set-1	5	13	AB6	L3(63), L2(64), L1(65), C(66)	32.8054	0.0055255	0.724541	0.00328005			45.379	0.00226545		0.9994	45.3518
2021-Feb-24	set-1	5	14	AB1-3	L3(63), L2(64), L1(65), C(66)	17.0274	0.0058052	17.1677	0.00347959			0.991741	2.93016e-05		0.999334	0.991081
2021-Feb-24	set-1	5	15	AB7	L3(63), L2(64), L1(65), C(66)	14.4426	0.00355719	19.4738	0.00215299			0.741545	1.68866e-05		0.999332	0.74105
2021-Feb-24	set-1	5	16	AB8	L3(63), L2(64), L1(65), C(66)	11.4207	0.00549518	23.0889	0.00331055			0.494538	1.02162e-05		0.99933	0.494207
2021-Feb-24	set-1	5	17	AB9	L3(63), L2(64), L1(65), C(66)	5.73406	0.00372705	27.1507	0.00227321			0.21109	4.11911e-06		0.999328	0.210948
2021-Feb-24	set-1	5	18	AB10	L3(63), L2(64), L1(65), C(66)	3.46449	0.00370137	31.812	0.00226054			0.108811	2.52453e-06		0.999326	0.108738
2021-Feb-24	set-1	5	19	AB11	L3(63), L2(64), L1(65), C(66)	0.748496	0.00396381	33.2421	0.00242298			0.0224221	2.69335e-05		0.999324	0.022407
2021-Feb-24	set-1	5	20	AB1-4	L3(63), L2(64), L1(65), C(66)	16.9925	0.0057624	17.1323	0.00345269			0.991753	2.93016e-05		0.999322	0.991081
2021-Feb-24	set-1	5	21	blank2	L3(63), L2(64), L1(65), C(66)	0.00275605	0.00560871	0.0016017	0.00334251
2021-Mar-10	set-2	6	1	blank1	L3(63), L2(64), L1(65), C(66)	0.000888853		0.0005719
2021-Mar-10	set-2	6	2	AB1-1	L3(63), L2(64), L1(65), C(66)	16.2672		16.7661				0.970221	6.49322e-05		1	0.970221
2021-Mar-10	set-2	6	3	A	L3(63), L2(64), L1(65), C(66)	32.943		0.0524248				635.299	12.1564		1.00004	635.322
2021-Mar-10	set-2	6	4	B	L3(63), L2(64), L1(65), C(66)	0.12313		37.6279				0.00324875	1.52049e-06		1.00007	0.00324898
2021-Mar-10	set-2	6	5	AB2	L3(63), L2(64), L1(65), C(66)	16.1427		16.5031				0.978144	3.88503e-05		1.00011	0.97825
2021-Mar-10	set-2	6	6	HICU-1	L3(63), L2(64), L1(65), C(66)	22.635		10.6419				2.127	9.07824e-05		1.00014	2.12731
2021-Mar-10	set-2	6	7	NIST976	L3(63), L2(64), L1(65), C(66)	21.7809		10.2416				2.12674	6.7794e-05		1.00018	2.12712
2021-Mar-10	set-2	6	8	AB1-2	L3(63), L2(64), L1(65), C(66)	15.8553		16.3451				0.970012	3.37579e-05		1.00022	0.970221
2021-Mar-10	set-2	6	9	AB3	L3(63), L2(64), L1(65), C(66)	16.076		16.388				0.980945	2.61628e-05		1.00023	0.981166
2021-Mar-10	set-2	6	10	AB4	L3(63), L2(64), L1(65), C(66)	21.8569		9.65649				2.26349	0.000103612		1.00023	2.26402
2021-Mar-10	set-2	6	11	AB5	L3(63), L2(64), L1(65), C(66)	22.163		9.77466				2.26744	7.20463e-05		1.00024	2.26799
2021-Mar-10	set-2	6	12	AB6	L3(63), L2(64), L1(65), C(66)	21.6991		9.52248				2.27877	8.8214e-05		1.00025	2.27934
2021-Mar-10	set-2	6	13	AB1-3	L3(63), L2(64), L1(65), C(66)	15.7249		16.2114				0.969967	0.000131486		1.00026	0.970221
2021-Mar-10	set-2	6	14	blank2	L3(63), L2(64), L1(65), C(66)	0.000851272		0.000559527
2021-Mar-17	set-2	7	1	blank1	C(63), H1(65)	0.000720083		0.000442134
2021-Mar-17	set-2	7	2	AB1-1	C(63), H1(65)	13.9842		14.41				0.970437	3.51029e-05		1	0.970437
2021-Mar-17	set-2	7	3	A	C(63), H1(65)	28.0032		0.04397				643.323	0.664568		1.00002	643.333
2021-Mar-17	set-2	7	4	B	C(63), H1(65)	0.104585		31.9635				0.00324954	2.81835e-06		1.00003	0.00324965
2021-Mar-17	set-2	7	5	AB2	C(63), H1(65)	13.8503		14.1554				0.978428	2.72824e-05		1.00005	0.978477
2021-Mar-17	set-2	7	6	HICU-1	C(63), H1(65)	19.3085		9.07556				2.12755	4.46629e-05		1.00007	2.12769
2021-Mar-17	set-2	7	7	NIST976	C(63), H1(65)	18.7195		8.79878				2.12754	3.5583e-05		1.00008	2.12772
2021-Mar-17	set-2	7	8	AB1-2	C(63), H1(65)	13.6431		14.0598				0.970341	3.20026e-05		1.0001	0.970437
2021-Mar-17	set-2	7	9	AB3	C(63), H1(65)	13.8113		14.0742				0.981296	2.02284e-05		1.00012	0.981414
2021-Mar-17	set-2	7	10	AB4	C(63), H1(65)	18.8638		8.33114				2.26428	4.00427e-05		1.00014	2.2646
2021-Mar-17	set-2	7	11	AB5	C(63), H1(65)	19.1077		8.42434				2.26819	4.07283e-05		1.00016	2.26856
2021-Mar-17	set-2	7	12	AB6	C(63), H1(65)	18.5427		8.13453				2.27954	3.38952e-05		1.00019	2.27996
2021-Mar-17	set-2	7	13	AB1-3	C(63), H1(65)	13.4354		13.8472				0.970236	2.49114e-05		1.00021	0.970437
2021-Mar-17	set-2	7	14	blank2	C(63), H1(65)	0.000780587		0.000485469
2021-Mar-24	set-2	8	1	blank1	C(63), H1(65)	0.00075181		0.000449408
2021-Mar-24	set-2	8	2	AB1-1	C(63), H1(65)	14.095		14.5684				0.967486	4.84004e-05		1	0.967486
2021-Mar-24	set-2	8	3	AB6	C(63), H1(65)	19.4819		8.57139				2.27293	6.34031e-05		0.999979	2.27288
2021-Mar-24	set-2	8	4	AB5	C(63), H1(65)	19.8676		8.78435				2.26173	9.46175e-05		0.999958	2.26164
2021-Mar-24	set-2	8	5	AB4	C(63), H1(65)	19.6198		8.68933				2.25794	8.77666e-05		0.999937	2.2578
2021-Mar-24	set-2	8	6	AB3	C(63), H1(65)	14.3771		14.6917				0.978563	3.32085e-05		0.999916	0.97848
2021-Mar-24	set-2	8	7	NIST976	C(63), H1(65)	19.4165		9.15197				2.12159	8.21135e-05		0.999895	2.12136
2021-Mar-24	set-2	8	8	AB1-2	C(63), H1(65)	14.2467		14.7233				0.967609	8.25574e-05		0.999873	0.967486
2021-Mar-24	set-2	8	9	HICU-1	C(63), H1(65)	20.068		9.45838				2.12174	3.78237e-05		0.999842	2.1214
2021-Mar-24	set-2	8	10	AB2	C(63), H1(65)	14.2772		14.632				0.975729	2.84446e-05		0.99981	0.975544
2021-Mar-24	set-2	8	11	B	C(63), H1(65)	0.107219		32.847				0.00324135	3.93785e-06		0.999778	0.00324063
2021-Mar-24	set-2	8	12	A	C(63), H1(65)	28.4906		0.0448895				641.085	2.39982		0.999747	640.922
2021-Mar-24	set-2	8	13	AB1-3	C(63), H1(65)	14.1549		14.6261				0.967762	5.97021e-05		0.999715	0.967486
2021-Mar-24	set-2	8	14	blank2	C(63), H1(65)	0.000797976		0.000505714
2021-Mar-31	set-2	9	1	blank1	C(63), H1(65)	0.000983094		0.00059995
2021-Mar-31	set-2	9	2	AB1-1	C(63), H1(65)	14.9558		15.4484				0.968087	2.3731e-05		1	0.968087
2021-Mar-31	set-2	9	3	AB6	C(63), H1(65)	20.6456		9.07737				2.27444	6.21046e-05		0.99997	2.27437
2021-Mar-31	set-2	9	4	AB5	C(63), H1(65)	21.2263		9.37955				2.26308	4.18969e-05		0.99994	2.26294
2021-Mar-31	set-2	9	5	AB4	C(63), H1(65)	20.7776		9.19655				2.25932	9.44705e-05		0.999909	2.25912
2021-Mar-31	set-2	9	6	AB3	C(63), H1(65)	15.3206		15.6462				0.979166	1.58446e-05		0.999879	0.979047
2021-Mar-31	set-2	9	7	NIST976	C(63), H1(65)	20.6539		9.72987				2.12276	6.62744e-05		0.999849	2.12244
2021-Mar-31	set-2	9	8	AB1-2	C(63), H1(65)	14.9851		15.4759				0.968262	3.60254e-05		0.999819	0.968087
2021-Mar-31	set-2	9	9	HICU-1	C(63), H1(65)	21.2365		10.003				2.12303	7.66188e-05		0.999805	2.12262
2021-Mar-31	set-2	9	10	AB2	C(63), H1(65)	15.0695		15.4347				0.976314	3.25397e-05		0.999792	0.976111
2021-Mar-31	set-2	9	11	B	C(63), H1(65)	0.113867		34.8405				0.00324006	3.93982e-06		0.999778	0.00323935
2021-Mar-31	set-2	9	12	A	C(63), H1(65)	30.3459		0.0479007				641.532	3.91939		0.999765	641.381
2021-Mar-31	set-2	9	13	AB1-3	C(63), H1(65)	14.9963		15.4864				0.968328	3.15254e-05		0.999752	0.968087
2021-Mar-31	set-2	9	14	blank2	C(63), H1(65)	0.000985287		0.000616408

## Sheet: 2_mixtures
date	set_id	sample_id	mass_A_g	mass_B_g	mass_4ppm_HICU1_g	mass_4ppm_NIST976_g	m_final_g	u_m_g
2020-Dec-01	set-1	blank					40	0.0001
2020-Dec-01	set-1	A	10.1071				40	0.0001
2020-Dec-01	set-1	B		10.1488			40	0.0001
2020-Dec-01	set-1	HICU-1			10.2226		40	0.0001
2020-Dec-01	set-1	NIST976				10.1878	40	0.0001
2020-Dec-01	set-1	AB1	5.12905	5.0733			40	0.0001
2020-Dec-01	set-1	AB1b	5.1106	4.9822			40	0.0001
2020-Dec-01	set-1	AB2	6.1866	4.0794			40	0.0001
2020-Dec-01	set-1	AB3	7.01885	3.29405			40	0.0001
2020-Dec-01	set-1	AB4	8.42985	1.7525			40	0.0001
2020-Dec-01	set-1	AB5	9.21475	1.00635			40	0.0001
2020-Dec-01	set-1	AB6	9.9455	0.1986			40	0.0001
2020-Dec-01	set-1	AB7	4.30325	5.6996			40	0.0001
2020-Dec-01	set-1	AB8	3.39135	6.75905			40	0.0001
2020-Dec-01	set-1	AB9	1.7393	8.1924			40	0.0001
2020-Dec-01	set-1	AB10	0.99895	9.2645			40	0.0001
2020-Dec-01	set-1	AB11	0.18925	9.6842			40	0.0001
2021-Mar-10	set-2	blank					40	0.0001
2021-Mar-10	set-2	A	10.0305				40	0.0001
2021-Mar-10	set-2	B		10.1165			40	0.0001
2021-Mar-10	set-2	HICU-1			10		40	0.0001
2021-Mar-10	set-2	NIST976				10	40	0.0001
2021-Mar-10	set-2	AB1	4.9808	5.0497			40	0.0001
2021-Mar-10	set-2	AB2	5.0233	5.0502			40	0.0001
2021-Mar-10	set-2	AB3	5.0223	5.0338			40	0.0001
2021-Mar-10	set-2	AB4	7.0024	3.0297			40	0.0001
2021-Mar-10	set-2	AB5	7.0485	3.0442			40	0.0001
2021-Mar-10	set-2	AB6	7.0518	3.0298			40	0.0001

## Sheet: 3_solutions
set_id	sample_id	m1_g	m1_final_g	m2_g	m2_final_g	u_m_g	w_mg_kg
set-1	A	2.09905	107.987	11.7302	117.954	0.0001	3.98688
set-1	B	2.16085	105.141	11.8582	118.748	0.0001	3.99773
set-2	A	5.5453	133.897	5.0524	107.83	0.0001	4.0022
set-2	B	4.7734	116.046	5.3951	108.099	0.0001	3.99892

## Sheet: 4_stock
sample_name	sample_id	purity_g_g	u_purity_g_g	w_stock_mg_kg	u_w_stock_mg_kg
63Cu	A	0.999759	0.0001847	2062.47	0.0265
65Cu	B	0.999903	4.87202e-05	1947.9	0.0265

## Sheet: 5_homogeneity
date	set_id	sanoke_description	sample_id	63Cu	65Cu	69Ga	71Ga	63Cu/65Cu	69Ga/71Ga		f_Cu	R_Ga	R_Ga	f_Ga	R_Cu	delta_permilles
2019-01-29	1	blank	blank	0.0024241	0.00114773	0.013136	0.00843921
2019-01-29	1	HICU1 Cu_and_NIST994 Ga	Cu_mix	35.642	16.8794	40.8723	28.672	2.11157	1.42547		-1.90745	1.5057
2019-01-29	1	HICU1 Cu_and_NIST994 Ga	Cu_1	35.3941	16.7617	41.293	28.967	2.1116	1.42548				1.50574	-1.90828	2.24139	0.0417655
2019-01-29	1	HICU1 Cu_and_NIST994 Ga	Cu_mix	35.7754	16.9436	41.0628	28.8056	2.11143	1.42548		-1.90947	1.50579
2019-01-29	1	HICU1 Cu_and_NIST994 Ga	Cu_1	35.4219	16.7767	41.4295	29.0632	2.11137	1.42546				1.50581	-1.91039	2.2413	-0.000144486
2019-01-29	1	HICU1 Cu_and_NIST994 Ga	Cu_mix	35.7083	16.9128	41.0058	28.7661	2.11132	1.42545		-1.91114	1.50583
2019-01-29	1	HICU1 Cu_and_NIST994 Ga	Cu_1	35.3192	16.7275	41.2356	28.9263	2.11144	1.4255				1.50586	-1.9105	2.24138	0.0340371
2019-01-29	1	HICU1 Cu_and_NIST994 Ga	Cu_mix	35.9049	17.0057	41.2325	28.924	2.11134	1.42551		-1.91087	1.50588
2019-01-29	1	HICU1 Cu_and_NIST994 Ga	Cu_1	35.857	16.9811	41.8356	29.3443	2.11158	1.42565				1.50589	-1.90765	2.24132	0.010938
2019-01-29	1	HICU1 Cu_and_NIST994 Ga	Cu_mix	36.2418	17.1626	41.4553	29.076	2.11167	1.42572		-1.90595	1.50589
2019-01-29	1	HICU1 Cu_and_NIST994 Ga	Cu_1	35.9896	17.0433	41.9745	29.4392	2.11166	1.42576				1.50589	-1.90474	2.24121	-0.0411537
2019-01-29	1	HICU1 Cu_and_NIST994 Ga	Cu_mix	36.3356	17.2049	41.4338	29.0576	2.11193	1.42588		-1.90193	1.50588
2019-01-29	2	blank	blank	0.0024241	0.00114773	0.013136	0.00843921
2019-01-29	2	HICU1 Cu_and_NIST994 Ga	Cu_mix	36.3356	17.2049	41.4338	29.0576	2.11193	1.42588		-1.90193	1.50588
2019-01-29	2	HICU1 Cu_and_NIST994 Ga	Cu_2	37.1687	17.5997	42.3347	29.6896	2.11189	1.42587				1.50589	-1.90223	2.24128	-0.0110752
2019-01-29	2	HICU1 Cu_and_NIST994 Ga	Cu_mix	36.2918	17.184	41.3488	28.9975	2.11195	1.42591		-1.90168	1.5059
2019-01-29	2	HICU1 Cu_and_NIST994 Ga	Cu_2	36.9776	17.5086	42.0407	29.4826	2.11197	1.42591				1.50595	-1.90269	2.2414	0.0427043
2019-01-29	2	HICU1 Cu_and_NIST994 Ga	Cu_mix	36.498	17.2826	41.6786	29.2284	2.11184	1.42593		-1.90336	1.506
2019-01-29	2	HICU1 Cu_and_NIST994 Ga	Cu_2	37.125	17.5798	42.3201	29.6787	2.1118	1.4259				1.506	-1.90397	2.2413	0.000146
2019-01-29	2	HICU1 Cu_and_NIST994 Ga	Cu_mix	36.2812	17.1803	41.4224	29.0492	2.11179	1.4259		-1.9041	1.506
2019-01-29	2	HICU1 Cu_and_NIST994 Ga	Cu_2	36.911	17.4785	42.0671	29.5018	2.1118	1.42588				1.506	-1.90455	2.24134	0.0200577
2019-01-29	2	HICU1 Cu_and_NIST994 Ga	Cu_mix	36.3401	17.2081	41.4821	29.0911	2.1118	1.4259		-1.90397	1.50599
2019-01-29	2	HICU1 Cu_and_NIST994 Ga	Cu_2	37.0568	17.5474	42.2274	29.6135	2.11182	1.42591				1.506	-1.9038	2.24131	0.00338291
2019-01-29	2	HICU1 Cu_and_NIST994 Ga	Cu_mix	36.3278	17.2027	41.4936	29.0995	2.11175	1.42589		-1.90475	1.50602
2019-01-29	3	blank	blank	0.00909983	0.00418483	0.0294161	0.0188749
2019-01-29	3	HICU1 Cu_and_NIST994 Ga	Cu_mix	36.6361	17.3457	41.7999	29.3138	2.1121	1.42586		-1.89934	1.50576
2019-01-29	3	HICU1 Cu_and_NIST994 Ga	Cu_3	36.29	17.1816	41.8221	29.3297	2.11212	1.42584				1.50576	-1.90002	2.24137	0.0303145
2019-01-29	3	HICU1 Cu_and_NIST994 Ga	Cu_mix	36.3561	17.2134	41.4195	29.0472	2.11206	1.42585		-1.90001	1.50577
2019-01-29	3	HICU1 Cu_and_NIST994 Ga	Cu_3	36.2264	17.152	41.7327	29.2661	2.11207	1.42589				1.50579	-1.89952	2.24127	-0.0116676
2019-01-29	3	HICU1 Cu_and_NIST994 Ga	Cu_mix	36.3144	17.1933	41.3113	28.9701	2.11211	1.42591		-1.89927	1.5058
2019-01-29	3	HICU1 Cu_and_NIST994 Ga	Cu_3	36.3931	17.2324	42.0129	29.4638	2.11189	1.42583				1.50583	-1.90186	2.24125	-0.0243867
2019-01-29	3	HICU1 Cu_and_NIST994 Ga	Cu_mix	36.3478	17.2107	41.4234	29.0502	2.11192	1.42584		-1.90213	1.50585
2019-01-29	3	HICU1 Cu_and_NIST994 Ga	Cu_3	36.3772	17.2247	41.9297	29.4058	2.1119	1.42582				1.50586	-1.90288	2.24134	0.0164946
2019-01-29	3	HICU1 Cu_and_NIST994 Ga	Cu_mix	36.4223	17.2464	41.5315	29.1264	2.11186	1.42582		-1.90305	1.50587
2019-01-29	3	HICU1 Cu_and_NIST994 Ga	Cu_3	36.1864	17.1347	41.7321	29.2676	2.11186	1.4258				1.50587	-1.90354	2.24133	0.0153557
2019-01-29	3	HICU1 Cu_and_NIST994 Ga	Cu_mix	36.3935	17.2332	41.5051	29.1086	2.11181	1.42578		-1.90378	1.50587
2019-01-29	4	blank	blank	0.0100885	0.00460403	0.0334642	0.0214772
2019-01-29	4	HICU1 Cu_and_NIST994 Ga	Cu_mix	36.3905	17.2293	41.4634	29.0787	2.11211	1.4258		-1.89929	1.50569
2019-01-29	4	HICU1 Cu_and_NIST994 Ga	Cu_4	34.8342	16.4938	42.4247	29.7541	2.11194	1.42575				1.50574	-1.9018	2.24129	-0.00260565
2019-01-29	4	HICU1 Cu_and_NIST994 Ga	Cu_mix	36.1722	17.1276	41.2491	28.9291	2.11191	1.42577		-1.90232	1.50578
2019-01-29	4	HICU1 Cu_and_NIST994 Ga	Cu_4	34.9202	16.5353	40.7539	28.5827	2.11183	1.42572				1.5058	-1.90365	2.24131	0.0065365
2019-01-29	4	HICU1 Cu_and_NIST994 Ga	Cu_mix	36.1268	17.1068	41.2026	28.8973	2.11181	1.42573		-1.90375	1.50581
2019-01-29	4	HICU1 Cu_and_NIST994 Ga	Cu_4	34.9193	16.5349	39.8938	27.9795	2.11183	1.42572				1.50582	-1.9041	2.24134	0.0195214
2019-01-29	4	HICU1 Cu_and_NIST994 Ga	Cu_mix	36.0134	17.0537	41.1027	28.8277	2.11175	1.42571		-1.90477	1.50582
2019-01-29	4	HICU1 Cu_and_NIST994 Ga	Cu_4	34.8055	16.482	39.4941	27.7003	2.11171	1.42566				1.50581	-1.90558	2.24132	0.0086225
2019-01-29	4	HICU1 Cu_and_NIST994 Ga	Cu_mix	35.8762	16.9886	40.9319	28.7082	2.11176	1.42569		-1.90459	1.50581
2019-01-29	4	HICU1 Cu_and_NIST994 Ga	Cu_4	34.6953	16.4291	39.1566	27.4631	2.1118	1.42569				1.50578	-1.90425	2.24132	0.00906036
2019-01-29	4	HICU1 Cu_and_NIST994 Ga	Cu_mix	35.8135	16.9583	40.8231	28.6317	2.11184	1.4257		-1.90336	1.50576
2019-01-30	5	HICU1 Cu_and_NIST994 Ga	blank	0.0111588	0.00518329	0.0252608	0.0164818
2019-01-30	5	HICU1 Cu_and_NIST994 Ga	Cu_mix	38.7262	18.2443	41.2025	28.7632	2.12264	1.43241		-1.74016	1.50578
2019-01-30	5	HICU1 Cu_and_NIST994 Ga	Cu_5	38.4479	18.1145	41.353	28.8695	2.12249	1.43235				1.5058	-1.74221	2.24128	-0.00775425
2019-01-30	5	HICU1 Cu_and_NIST994 Ga	Cu_mix	39.2418	18.4872	41.8876	29.2405	2.12264	1.43246		-1.7402	1.50583
2019-01-30	5	HICU1 Cu_and_NIST994 Ga	Cu_5	39.1333	18.4374	42.2436	29.4906	2.12248	1.43239				1.50585	-1.74234	2.24129	-0.00572443
2019-01-30	5	HICU1 Cu_and_NIST994 Ga	Cu_mix	39.2504	18.4924	41.933	29.2732	2.12251	1.43242		-1.74211	1.50586
2019-01-30	5	HICU1 Cu_and_NIST994 Ga	Cu_5	39.3044	18.5175	42.4812	29.6555	2.12255	1.43243				1.50587	-1.74175	2.24132	0.0073815
2019-01-30	5	HICU1 Cu_and_NIST994 Ga	Cu_mix	39.2023	18.4696	41.9131	29.259	2.12252	1.43243		-1.74188	1.50587
2019-01-30	5	HICU1 Cu_and_NIST994 Ga	Cu_5	39.2354	18.4856	42.3734	29.58	2.12248	1.43245				1.5059	-1.74208	2.24126	-0.0167912
2019-01-30	5	HICU1 Cu_and_NIST994 Ga	Cu_mix	38.8653	18.3122	41.5121	28.9802	2.12236	1.43237		-1.74441	1.50592
2019-01-30	5	HICU1 Cu_and_NIST994 Ga	Cu_5	39.1216	18.4326	42.2628	29.5039	2.1224	1.43239				1.50592	-1.7441	2.24133	0.011784
2019-01-30	5	HICU1 Cu_and_NIST994 Ga	Cu_mix	38.9163	18.3365	41.5973	29.0399	2.12233	1.43236		-1.74487	1.50593
2019-01-30	6	HICU1 Cu_and_NIST994 Ga	blank	0.00969962	0.00438703	0.030386	0.0195031
2019-01-30	6	HICU1 Cu_and_NIST994 Ga	Cu_mix	38.0114	17.9172	40.8125	28.5043	2.12148	1.43172		-1.75756	1.5058
2019-01-30	6	HICU1 Cu_and_NIST994 Ga	Cu_6	36.6655	17.2826	40.0296	27.957	2.1215	1.43174				1.50581	-1.75735	2.2413	0.00120789
2019-01-30	6	HICU1 Cu_and_NIST994 Ga	Cu_mix	37.5839	17.7162	40.3621	28.1899	2.12142	1.43171		-1.75851	1.50583
2019-01-30	6	HICU1 Cu_and_NIST994 Ga	Cu_6	36.7364	17.3173	40.0131	27.9467	2.12135	1.43168				1.50586	-1.75986	2.24132	0.00953316
2019-01-30	6	HICU1 Cu_and_NIST994 Ga	Cu_mix	37.7324	17.7878	40.5769	28.3413	2.12122	1.43164		-1.76149	1.50589
2019-01-30	6	HICU1 Cu_and_NIST994 Ga	Cu_6	36.6742	17.2888	39.9551	27.907	2.12125	1.43164				1.50588	-1.7615	2.24133	0.0111992
2019-01-30	6	HICU1 Cu_and_NIST994 Ga	Cu_mix	37.8491	17.8423	40.7092	28.4329	2.12129	1.43168		-1.7605	1.50588
2019-01-30	6	HICU1 Cu_and_NIST994 Ga	Cu_6	35.5216	16.7487	38.6845	27.0243	2.12083	1.43138				1.50588	-1.76772	2.24132	0.010255
2019-01-30	6	HICU1 Cu_and_NIST994 Ga	Cu_mix	36.9637	17.4275	39.7449	27.7631	2.12098	1.43148		-1.76521	1.50588
2019-01-30	6	HICU1 Cu_and_NIST994 Ga	Cu_6	36.218	17.0754	39.4684	27.5693	2.12104	1.43152				1.50588	-1.76424	2.2413	0.000627339
2019-01-30	6	HICU1 Cu_and_NIST994 Ga	Cu_mix	36.9659	17.4286	39.7564	27.7714	2.12097	1.43147		-1.76533	1.50587
2019-01-30	7	HICU1 Cu_and_NIST994 Ga	blank	0.00882617	0.00399011	0.0272653	0.0175063
2019-01-30	7	HICU1 Cu_and_NIST994 Ga	Cu_mix	37.9073	17.8681	40.6695	28.4018	2.12148	1.43186		-1.75758	1.50595
2019-01-30	7	HICU1 Cu_and_NIST994 Ga	Cu_7	37.4826	17.6666	40.6957	28.4185	2.12165	1.43194				1.50595	-1.75569	2.24134	0.0181428
2019-01-30	7	HICU1 Cu_and_NIST994 Ga	Cu_mix	38.5594	18.1737	41.4378	28.9356	2.12169	1.43199		-1.7544	1.50595
2019-01-30	7	HICU1 Cu_and_NIST994 Ga	Cu_7	37.8221	17.8263	41.0893	28.6927	2.12168	1.43197				1.50595	-1.75493	2.24132	0.00867492
2019-01-30	7	HICU1 Cu_and_NIST994 Ga	Cu_mix	38.5039	18.1482	41.3986	28.9092	2.12162	1.43195		-1.75554	1.50595
2019-01-30	7	HICU1 Cu_and_NIST994 Ga	Cu_7	37.4696	17.6604	40.691	28.4147	2.12165	1.43196				1.50596	-1.75525	2.24131	0.0066267
2019-01-30	7	HICU1 Cu_and_NIST994 Ga	Cu_mix	38.5757	18.1816	41.4625	28.953	2.12167	1.43199		-1.7547	1.50596
2019-01-30	7	HICU1 Cu_and_NIST994 Ga	Cu_7	37.562	17.7039	40.7936	28.4863	2.12166	1.43196				1.50595	-1.75515	2.24132	0.00698833
2019-01-30	7	HICU1 Cu_and_NIST994 Ga	Cu_mix	38.2242	18.0167	41.083	28.6893	2.12158	1.43192		-1.75612	1.50595
2019-01-30	7	HICU1 Cu_and_NIST994 Ga	Cu_7	37.0873	17.4814	40.278	28.128	2.12151	1.43188				1.50595	-1.75721	2.2413	0.0016125
2019-01-30	7	HICU1 Cu_and_NIST994 Ga	Cu_mix	38.2422	18.0256	41.1242	28.7188	2.12152	1.43189		-1.75697	1.50595
2019-01-30	8	HICU1 Cu_and_NIST994 Ga	blank	0.0111588	0.00518329	0.0252608	0.0164818
2019-01-30	8	HICU1 Cu_and_NIST994 Ga	Cu_mix	38.7006	18.2366	41.3844	28.8933	2.12213	1.43226		-1.74784	1.50595
2019-01-30	8	HICU1 Cu_and_NIST994 Ga	Cu_8	37.8642	17.8417	41.071	28.6745	2.12222	1.43226				1.50592	-1.74715	2.24135	0.0215726
2019-01-30	8	HICU1 Cu_and_NIST994 Ga	Cu_mix	38.7456	18.2569	41.4599	28.9458	2.12223	1.43227		-1.74631	1.5059
2019-01-30	8	HICU1 Cu_and_NIST994 Ga	Cu_8	38.2799	18.036	41.5822	29.0294	2.12241	1.43236				1.50589	-1.74413	2.24133	0.0145275
2019-01-30	8	HICU1 Cu_and_NIST994 Ga	Cu_mix	38.996	18.3736	41.7468	29.1443	2.12239	1.43236		-1.74397	1.50589
2019-01-30	8	HICU1 Cu_and_NIST994 Ga	Cu_8	38.2702	18.0313	41.5614	29.0144	2.12242	1.43238				1.50588	-1.74328	2.24129	-0.00521705
2019-01-30	8	HICU1 Cu_and_NIST994 Ga	Cu_mix	39.0253	18.388	41.8074	29.1877	2.12232	1.43231		-1.74496	1.50588
2019-01-30	8	HICU1 Cu_and_NIST994 Ga	Cu_8	37.9688	17.8905	41.2519	28.8005	2.12228	1.43228				1.50589	-1.74603	2.24133	0.0124997
2019-01-30	8	HICU1 Cu_and_NIST994 Ga	Cu_mix	38.6286	18.2023	41.4006	28.9049	2.12218	1.43224		-1.74715	1.5059
2019-01-30	8	HICU1 Cu_and_NIST994 Ga	Cu_8	37.5762	17.7063	40.8424	28.5158	2.12218	1.43221				1.50588	-1.7474	2.24132	0.0109804
2019-01-30	8	HICU1 Cu_and_NIST994 Ga	Cu_mix	38.331	18.0621	41.0869	28.6867	2.12217	1.4322		-1.74725	1.50586
2019-01-31	9	HICU1 Cu_and_NIST994 Ga	blank	0.00815319	0.00366982	0.0211665	0.0135994
2019-01-31	9	HICU1 Cu_and_NIST994 Ga	Cu_mix	34.8248	16.4257	37.1316	25.9531	2.12012	1.43065		-1.77813	1.50557
2019-01-31	9	HICU1 Cu_and_NIST994 Ga	Cu_9	36.9414	17.4193	39.578	27.656	2.12069	1.43102				1.50561	-1.77007	2.24134	0.0176993
2019-01-31	9	HICU1 Cu_and_NIST994 Ga	Cu_mix	34.4936	16.2708	36.8591	25.7632	2.11994	1.43062		-1.78085	1.50565
2019-01-31	9	HICU1 Cu_and_NIST994 Ga	Cu_9	36.2461	17.0945	38.9268	27.2041	2.12031	1.43085				1.50567	-1.77559	2.24132	0.0103956
2019-01-31	9	HICU1 Cu_and_NIST994 Ga	Cu_mix	33.9619	16.0219	36.3584	25.4153	2.11969	1.4305		-1.78465	1.50569
2019-01-31	9	HICU1 Cu_and_NIST994 Ga	Cu_9	35.6173	16.801	38.3149	26.7803	2.11992	1.43064				1.5057	-1.78146	2.24132	0.0101825
2019-01-31	9	HICU1 Cu_and_NIST994 Ga	Cu_mix	34.0892	16.0816	36.5171	25.5253	2.11974	1.43056		-1.78387	1.50571
2019-01-31	9	HICU1 Cu_and_NIST994 Ga	Cu_9	35.6394	16.8127	38.3781	26.8259	2.11977	1.43057				1.50571	-1.78359	2.24131	0.00635564
2019-01-31	9	HICU1 Cu_and_NIST994 Ga	Cu_mix	33.8421	15.9663	36.2791	25.3609	2.11956	1.43045		-1.78653	1.50571
2019-01-31	9	HICU1 Cu_and_NIST994 Ga	Cu_9	35.3649	16.6835	38.0865	26.6226	2.11973	1.43054				1.50572	-1.78444	2.24133	0.0147396
2019-01-31	9	HICU1 Cu_and_NIST994 Ga	Cu_mix	33.6797	15.8898	36.1107	25.243	2.11955	1.43046		-1.78669	1.50573
2019-01-31	10	HICU1 Cu_and_NIST994 Ga	blank	0.00815319	0.00366982	0.0211665	0.0135994
2019-01-31	10	HICU1 Cu_and_NIST994 Ga	Cu_mix	33.6797	15.8898	36.1107	25.243	2.11955	1.43046		-1.78669	1.50573
2019-01-31	10	HICU1 Cu_and_NIST994 Ga	Cu_10	32.8754	15.5085	35.5398	24.8417	2.1198	1.43058				1.50573	-1.78364	2.24135	0.0229435
2019-01-31	10	HICU1 Cu_and_NIST994 Ga	Cu_mix	33.7874	15.9409	36.2394	25.3333	2.11952	1.43044		-1.78719	1.50573
2019-01-31	10	HICU1 Cu_and_NIST994 Ga	Cu_10	32.7823	15.4655	35.4593	24.7865	2.11969	1.43052				1.50574	-1.78534	2.24135	0.0207788
2019-01-31	10	HICU1 Cu_and_NIST994 Ga	Cu_mix	33.8749	15.9821	36.3445	25.4065	2.11953	1.43045		-1.78701	1.50574
2019-01-31	10	HICU1 Cu_and_NIST994 Ga	Cu_10	32.9084	15.5237	35.5868	24.8737	2.11985	1.43063				1.50572	-1.78201	2.24129	-0.00441426
2019-01-31	10	HICU1 Cu_and_NIST994 Ga	Cu_mix	33.263	15.6932	35.6518	24.9228	2.11955	1.43042		-1.78669	1.50569
2019-01-31	10	HICU1 Cu_and_NIST994 Ga	Cu_10	32.4569	15.312	35.0865	24.5264	2.11968	1.43049				1.50571	-1.78517	2.24132	0.0104764
2019-01-31	10	HICU1 Cu_and_NIST994 Ga	Cu_mix	33.5368	15.8227	35.9732	25.1475	2.11951	1.43042		-1.78733	1.50572
2019-01-31	10	HICU1 Cu_and_NIST994 Ga	Cu_10	32.5759	15.3687	35.2355	24.6309	2.1196	1.43047				1.50572	-1.78615	2.24131	0.00394534
2019-01-31	10	HICU1 Cu_and_NIST994 Ga	Cu_mix	33.3156	15.72	35.755	24.9972	2.11929	1.43029		-1.79062	1.50572
2019-01-31	11	HICU1 Cu_and_NIST994 Ga	blank	0.00980088	0.00438692	0.0277325	0.0178049
2019-01-31	11	HICU1 Cu_and_NIST994 Ga	Cu_mix	33.3262	15.7231	35.6769	24.943	2.11954	1.43024		-1.78686	1.50552
2019-01-31	11	HICU1 Cu_and_NIST994 Ga	Cu_11	32.6967	15.427	34.8939	24.3973	2.11941	1.43015				1.50553	-1.78961	2.24135	0.0236663
2019-01-31	11	HICU1 Cu_and_NIST994 Ga	Cu_mix	33.5421	15.8225	35.9265	25.1135	2.11987	1.43047		-1.78194	1.50555
2019-01-31	11	HICU1 Cu_and_NIST994 Ga	Cu_11	32.5327	15.3513	34.7689	24.311	2.11918	1.43008				1.50558	-1.79235	2.2413	0.00169647
2019-01-31	11	HICU1 Cu_and_NIST994 Ga	Cu_mix	33.043	15.5904	35.4431	24.7794	2.11942	1.43025		-1.78876	1.5056
2019-01-31	11	HICU1 Cu_and_NIST994 Ga	Cu_11	32.7014	15.4276	34.9252	24.4157	2.11963	1.43035				1.50561	-1.7865	2.24137	0.0307086
2019-01-31	11	HICU1 Cu_and_NIST994 Ga	Cu_mix	32.8472	15.4988	35.2469	24.6434	2.11931	1.43019		-1.79039	1.50561
2019-01-31	11	HICU1 Cu_and_NIST994 Ga	Cu_11	32.1115	15.1522	34.3164	23.9943	2.11923	1.4301				1.50561	-1.79267	2.24137	0.0326291
2019-01-31	11	HICU1 Cu_and_NIST994 Ga	Cu_mix	32.8816	15.515	35.2857	24.6704	2.11931	1.43019		-1.79043	1.50561
2019-01-31	11	HICU1 Cu_and_NIST994 Ga	Cu_11	32.2633	15.2242	34.4923	24.1177	2.11917	1.43007				1.50562	-1.79342	2.24137	0.0292782
2019-01-31	11	HICU1 Cu_and_NIST994 Ga	Cu_mix	32.9373	15.5415	35.3574	24.7208	2.11927	1.43018		-1.79091	1.50562
2019-01-31	12	HICU1 Cu_and_NIST994 Ga	blank	0.00980088	0.00438692	0.0277325	0.0178049
2019-01-31	12	HICU1 Cu_and_NIST994 Ga	Cu_mix	32.9373	15.5415	35.3574	24.7208	2.11927	1.43018		-1.79091	1.50562
2019-01-31	12	HICU1 Cu_and_NIST994 Ga	Cu_12	33.3464	15.7335	36.164	25.2834	2.11941	1.43026				1.50562	-1.78891	2.24131	0.00355068
2019-01-31	12	HICU1 Cu_and_NIST994 Ga	Cu_mix	32.83	15.4916	35.2593	24.6533	2.11918	1.43011		-1.79233	1.50561
2019-01-31	12	HICU1 Cu_and_NIST994 Ga	Cu_12	32.9525	15.55	35.7641	25.0076	2.1191	1.43004				1.5056	-1.7938	2.24132	0.00728252
2019-01-31	12	HICU1 Cu_and_NIST994 Ga	Cu_mix	32.5901	15.3775	34.9681	24.4488	2.11931	1.43017		-1.79036	1.50558
2019-01-31	12	HICU1 Cu_and_NIST994 Ga	Cu_12	33.0053	15.5735	35.8144	25.0407	2.11929	1.43016				1.50559	-1.7908	2.24131	0.00622606
2019-01-31	12	HICU1 Cu_and_NIST994 Ga	Cu_mix	32.6532	15.4073	35.0401	24.4989	2.11931	1.43018		-1.79039	1.5056
2019-01-31	12	HICU1 Cu_and_NIST994 Ga	Cu_12	33.5881	15.8449	36.4153	25.4559	2.11978	1.43044				1.5056	-1.78421	2.24136	0.0267644
2019-01-31	12	HICU1 Cu_and_NIST994 Ga	Cu_mix	32.8911	15.5197	35.3158	24.6919	2.11928	1.43017		-1.79088	1.50561
2019-01-31	12	HICU1 Cu_and_NIST994 Ga	Cu_12	32.8783	15.5146	35.686	24.9524	2.11915	1.43007				1.50561	-1.79316	2.24133	0.01326
2019-01-31	12	HICU1 Cu_and_NIST994 Ga	Cu_mix	33.0954	15.6136	35.5183	24.8299	2.11962	1.43038		-1.78575	1.5056
