# Supplementary material for: Determination of the isotopic composition of copper in a certified reference material HICU-1 by MC-ICP-MS using gravimetric isotope mixture calibration
Source: Royal Society of Chemistry journal article supplement (doi:10.1039/d3ja00212h), 2023-01-01
Supplement: d3ja00212h2.pdf [file d3ja00212h2.pdf]

```
#####  
# NRC HICU-1  
# Isotope ratio measurements of copper using gravimetric isotope mixture model  
#  
# Purity GDMS data: Brad Methven (Jan 2020)  
# Isotope ratio MCICPMS data: Lu Yang (Dec 2020 to Mar 2021)  
# Final data analysis: Juris Meija (Dec 2021, rev. Jan 2023, rev. Jun 2023)  
#####  
  
dev.off()  
  
# Read the data  
  
require(readxl)  
setwd('C:/Users/meijaj/Documents/jm-NRC/NRC_CRM/HICU-1/HICU-1-isotope-ratio')  
  
df_meas      = data.frame(read_xlsx('FGIM-Cu-Dec2021.xlsx', sheet = '1_measurements',  
col_types = c('text','text','numeric','numeric','text','text',rep('numeric',11))))  
df_mixtures  = data.frame(read_xlsx('FGIM-Cu-Dec2021.xlsx', sheet = '2_mixtures', col_types  
= c('text','text','text','text',rep('numeric',6))))  
df_solutions = data.frame(read_xlsx('FGIM-Cu-Dec2021.xlsx', sheet = '3_solutions',  
col_types = c('text','text',rep('numeric',6))))  
df_stock     = data.frame(read_xlsx('FGIM-Cu-Dec2021.xlsx', sheet = '4_stock', col_types =  
c('text','text',rep('numeric',4))))  
  
# Purity of copper isotope materials  
pA_meas = df_stock[df_stock$'sample_id'=='A',c('purity_g_g', 'u_purity_g_g')]  
pB_meas = df_stock[df_stock$'sample_id'=='B',c('purity_g_g', 'u_purity_g_g')]  
  
# Mass fraction of copper isotope materials in the primary stock solution  
wA_stock = df_stock[df_stock$'sample_id'=='A',c('w_stock_mg_kg', 'u_w_stock_mg_kg')]  
wB_stock = df_stock[df_stock$'sample_id'=='B',c('w_stock_mg_kg', 'u_w_stock_mg_kg')]  
  
# Atomic masses of copper  
require(CIAAWconsensus)  
m_a_Cu = unlist(subset(ciaaw.mass.2016, isotope %in% c('63Cu','65Cu'), select = 'mass'))  
u_m_a_Cu = unlist(subset(ciaaw.mass.2016, isotope %in% c('63Cu','65Cu'), select =  
'uncertainty'))  
  
# Gather mass data for gravimetric mixtures  
m_data_id = grepl('AB', df_mixtures$sample_id)  
m_data = df_mixtures[m_data_id, c('set_id','sample_id', 'mass_A_g', 'mass_B_g', 'u_m_g')]  
m_N = length(m_data$mass_A_g)  
  
# Produce a random draw for the mass fraction of copper in  
# solutions A and B for each set consistent with measurement uncertainties  
get_wAB = function(k=1){  
  # Purity of copper isotope materials (truncated to be <= 1 g/g)  
  pA_it = min(1, rnorm(1, pA_meas[1,'purity_g_g'], k * pA_meas[1,'u_purity_g_g']))  
  pB_it = min(1, rnorm(1, pB_meas[1,'purity_g_g'], k * pB_meas[1,'u_purity_g_g']))  
  
  # Mass fraction of copper isotope materials in the primary stock solution  
  wA_it = rnorm(1, wA_stock[1,'w_stock_mg_kg'], k * wA_stock[1,'u_w_stock_mg_kg'])  
  wB_it = rnorm(1, wB_stock[1,'w_stock_mg_kg'], k * wB_stock[1,'u_w_stock_mg_kg'])  
  
  # Mass of copper in the stock solution  
  wCu_stock_it = c('A'=pA_it * wA_it, 'B'=pB_it * wB_it)
```

```

# Dilution of the stock solutions
N = length(df_solutions[, 'm1_g'])
m1_it = rnorm(N, df_solutions[, 'm1_g'], df_solutions[, 'u_m_g'])
m2_it = rnorm(N, df_solutions[, 'm2_g'], df_solutions[, 'u_m_g'])
m1final_it = rnorm(N, df_solutions[, 'm1_final_g'], df_solutions[, 'u_m_g'])
m2final_it = rnorm(N, df_solutions[, 'm2_final_g'], df_solutions[, 'u_m_g'])

id = match(names(wCu_stock_it), df_solutions[, 'sample_id'])

res=data.frame(
  'set'=df_solutions[, 'set_id'],
  'sample'=df_solutions[, 'sample_id'],
  'wCu'=(m1_it/m1final_it)*(m2_it/m2final_it)*wCu_stock_it[id]
)
return(res)
}

# Calculation steps for set_id and analysis_id
# 1 Construct polynomial drift function for 65/63 isotope ratio from samples AB1-x as a
function of measurement_id
# 2 Apply drift function to all observed isotope ratios
# 3 For each gravimetric mix sample (AB1-1 and AB1b for set 1 and AB1-1, AB2, AB3 for set2)
calculate the mass bias factor
# 4 Calculate the correction factors for the sample and obtain the corrected isotope ratio

get_R = function(set_id, analysis_id, sample_id, w, m, m_a, draw=TRUE, k=1, fit=TRUE){

  wAB = get_wAB(k=k)
  m_a = rnorm(2, m_a_Cu, k*u_m_a_Cu)
  m_data$mass_A_g_it = rnorm(m_N, m_data$mass_A_g, k*m_data$u_m_g)
  m_data$mass_B_g_it = rnorm(m_N, m_data$mass_B_g, k*m_data$u_m_g)

  #set_id='set-1'
  #analysis_id='1'
  #sample_id='HICU-1'
  #sample_id='NIST976'
  w = wAB
  m = m_data
  m_a = m_a

  # get masses of the isotope solutions to make blends
  mAB = m[m$set_id==set_id, c('sample_id', 'mass_A_g_it', 'mass_B_g_it')]
  mAB$mass_A_g_it = mAB$mass_A_g_it * w[w$set==set_id & w$sample=='A', 'wCu']
  mAB$mass_B_g_it = mAB$mass_B_g_it * w[w$set==set_id & w$sample=='B', 'wCu']

  # get isotope ratios of the isotope blends
  r_data_id = df_meas$set_id == set_id & df_meas$analysis_id == analysis_id &
!grepl('blank|HIZN', df_meas$sample_id)
  r_data = df_meas[r_data_id, c('measurement_id', 'sample_id', 'X63Cu.65Cu', 'u_63Cu.65Cu')]
  r_data$X63Cu.65Cu_it = rnorm(length(r_data$X63Cu.65Cu), r_data$X63Cu.65Cu,
r_data$u_63Cu.65Cu)

  # cubic/quadratic drift correction
  spline_data = r_data[grepl('AB1-', r_data$sample_id),
c('measurement_id', 'X63Cu.65Cu_it')]

  # eliminate outliers (Aug 2022) JM
  if(set_id=='set-1'&analysis_id=='1') spline_data = spline_data[-2,]

```

```

if(set_id=='set-1'&analysis_id=='4') spline_data = spline_data[-3,]

# correction (Aug 2022) JM
spline_data[,2] = spline_data[,2]/spline_data[1,2]
sp = lm(X63Cu.65Cu_it ~ poly(measurement_id, 2), spline_data)

if(draw){
  plot(x=spline_data$measurement_id, y=spline_data$X63Cu.65Cu_it)
  p = predict(sp, newdata = data.frame(measurement_id=1:25))
  lines(x=1:25, y=p)
}

# apply drift correction for isotope ratios with AB1-1 set to zero-drift
r_data$drift_corr = predict(sp, newdata = list(measurement_id = r_data$measurement_id))
r_data$X63Cu.65Cu_drift_corr = r_data$X63Cu.65Cu_it * r_data$drift_corr

# calculate the isotope ratio correction factor for each grav. mix. sample AB
ab_id = grepl('AB', r_data$sample_id)
rA = r_data[r_data$sample_id=='A', 'X63Cu.65Cu_drift_corr']
rB = r_data[r_data$sample_id=='B', 'X63Cu.65Cu_drift_corr']
rAB = r_data[ab_id, c('sample_id', 'X63Cu.65Cu_drift_corr')]

# merge mass data and the isotope ratio data
dK = merge(mAB, rAB)
names(dK) = c('id', 'mA', 'mB', 'rAB')

# calculate isotope ratio correction factor for each mixture
dK$rK = (m_a[2]/m_a[1])*(dK$mA*(dK$rAB - rA) + dK$mB*(dK$rAB - rB))/(dK$mA*rB*(rA -
dK$rAB) + dK$mB*rA*(rB - dK$rAB))

# Average K factor for r = 1
K = mean(dK[dK$rAB < 1.05 & dK$rAB > 0.95, 'K'])

# calculate isotope ratios for the sample
s1 = which(r_data$sample_id == sample_id)
r_sample = r_data[s1, 'X63Cu.65Cu_drift_corr']

drift = r_data$drift_corr

if(fit) return ( K * r_sample )
if(!fit) return ( list(dK, K * r_sample, r_sample, rA, rB, drift, spline_data))
}

# FIGURE 0 # Isotope ratio drifts during the measurement sequences

plot(x=df_meas$measurement_id, y=df_meas$drift_Cu, ylim=c(0.998,1.002),pch='.')
text(x=df_meas$measurement_id, y=df_meas$drift_Cu, labels = df_meas$analysis_id)
# Set 1 Sequence 3 shows excessive isotope ratio drift

# END FIGURE 0

# FIGURE 1 # Manuscript (4.6 x 7 in)

K_63_65_set1_1 = replicate(1e3, {
  m_a = rnorm(2, m_a_Cu, u_m_a_Cu)
  m_data$mass_A_g_it = rnorm(m_N, m_data$mass_A_g, m_data$u_m_g)
  m_data$mass_B_g_it = rnorm(m_N, m_data$mass_B_g, m_data$u_m_g)

```

```

    get_R('set-1', 1, 'HICU-1', w = wAB, m = m_data, m_a = m_a, fit=F, draw=F)[[1]]$K
  })
K_63_65_set1_2 = replicate(1e3, {
  m_a = rnorm(2, m_a_Cu, u_m_a_Cu)
  m_data$mass_A_g_it = rnorm(m_N, m_data$mass_A_g, m_data$u_m_g)
  m_data$mass_B_g_it = rnorm(m_N, m_data$mass_B_g, m_data$u_m_g)
  get_R('set-1', 2, 'HICU-1', w = wAB, m = m_data, m_a = m_a, fit=F, draw=F)[[1]]$K
})

xx_r1=get_R('set-1', 1, 'HICU-1', w = wAB, m = m_data, m_a = m_a, fit=F, draw=F)[[1]]$rAB
xx_r2=get_R('set-1', 2, 'HICU-1', w = wAB, m = m_data, m_a = m_a, fit=F, draw=F)[[1]]$rAB

yy_K1=apply(K_63_65_set1_1,1,mean); yy_uK1=apply(K_63_65_set1_1,1,sd)
yy_K2=apply(K_63_65_set1_2,1,mean); yy_uK2=apply(K_63_65_set1_2,1,sd)

par(mar=c(5,5,1,1), mfrow=c(1,2), pty='s')
plot(x=xx_r1, y=yy_K1, log='x', xlim=c(0.1,10), ylim=c(1.055,1.0575),
     pch='', xlab=expression(''^63*'Cu/'^65*'Cu isotope ratio'),
     ylab=expression(italic('K')*('^63*'Cu/'^65*'Cu')) )
abline(v=c(1,2.24), lty=2)
segments(xx_r1, yy_K1-2*yy_uK1, xx_r1, yy_K1+2*yy_uK1, lwd=3, col=2)
points(x=xx_r1, y=yy_K1, pch=21, bg='white', cex=1.2)
mtext(side=3,line=0.4,text='95% CI', cex=0.8, adj=0.95)

plot(x=xx_r2, y=yy_K2, log='x', xlim=c(0.1,10), ylim=c(1.0515,1.0545),
     pch=19, xlab=expression(''^63*'Cu/'^65*'Cu isotope ratio'),
     ylab=expression(italic('K')*('^63*'Cu/'^65*'Cu')) )
abline(v=c(1,2.24), lty=2)
segments(xx_r2, yy_K2-2*yy_uK2, xx_r2, yy_K2+2*yy_uK2, lwd=3, col=2)
points(x=xx_r2, y=yy_K2, pch=21, bg='white', cex=1.2)
mtext(side=3,line=0.4,text='95% CI', cex=0.8, adj=0.95)

# END FIGURE 1

# Isotopic abundances and atomic weight of copper in NRC HICU-1
# 63Cu/65CU isotope ratio

# individual values from each measurement sequence
R_hicul_individual = replicate(1e4, {
  wAB = get_wAB()
  m_a = rnorm(2, m_a_Cu, u_m_a_Cu)
  m_data$mass_A_g_it = rnorm(m_N, m_data$mass_A_g, m_data$u_m_g)
  m_data$mass_B_g_it = rnorm(m_N, m_data$mass_B_g, m_data$u_m_g)
  r1 = sapply(c(1:5), function(analysis_id) get_R('set-1', analysis_id, 'HICU-1', w = wAB,
m = m_data, m_a = m_a, draw=F))
  r2 = sapply(6:9, function(analysis_id) get_R('set-2', analysis_id, 'HICU-1', w = wAB, m =
m_data, m_a = m_a, draw=F))
  c(r1,r2)
})

R_hic_u_individual_mu = apply(R_hicul_individual,1,mean)
R_hic_u_individual_u = apply(R_hicul_individual,1,sd)

# FIGURE 2 MANUSCRIPT (4.6 x 4.6 in)

par(mfrow=c(1,1), mar=c(5,5,1,2), pty='s')
plot(x=1:9,y=R_hic_u_individual_mu, ylim=c(2.240, 2.2426),

```

```

    pch='', xlab='Measurement sequence (Dec 2020 to Mar 2021)',
ylab=expression(italic(R)[63/65]*' in HICU-1'))
segments(1:9, R_hicu_individual_mu - 2*R_hicu_individual_u,
         1:9, R_hicu_individual_mu + 2*R_hicu_individual_u, lwd=3, col=2)
points(1:9, R_hicu_individual_mu, pch=21, bg=c(1,1,'white',1,1,1,1,1,1), cex=1.3)
axis(1, at=1:9, labels=1:9)
mtext(side=3, line=0.4, text='95% CI', cex=0.8, adj=0.95)

# END FIGURE 2

# Certified (combined) values for HICU-1 #####
# Set 1 Seq 3 removed

R_hicul = c(R_hicul_individual[-3,])

# Isotopic abundances and atomic weight
x63 = R_hicul/(1 + R_hicul)
x65 = 1 - x63
m63 = rnorm(length(x63), m_a_Cu[1], u_m_a_Cu[1])
m65 = rnorm(length(x65), m_a_Cu[2], u_m_a_Cu[2])
ACu = x63 * m63 + x65 * m65

# print summary
formatC(c( mean(ACu), sd(ACu), 2*sd(ACu) ), digits=5, format='f')
formatC(c( mean(R_hicul), sd(R_hicul), 2*sd(R_hicul)), digits=4, format='f')
formatC(c( mean(1/R_hicul), sd(1/R_hicul), 2*sd(1/R_hicul)), digits=5, format='f')
formatC(c( mean(x63), sd(x63), 2*sd(x63)), digits=5, format='f')
formatC(c( mean(x65), sd(x65), 2*sd(x65)), digits=5, format='f')

### Isotopic composition of copper in NRC HICU-1 #####
#
# Atomic weight, A_r(Cu) # 63.546 07 (u = 0.000 09, U_95 = 0.000 18) #
# Molar mass, M(Cu) # 63.546 07 (u = 0.000 09, U_95 = 0.000 18) #
# Isotope ratio, n(63Cu)/n(65Cu) # 2.2413 (u = 0.00045, U_95 = 0.0009) #
# Isotope ratio, n(65Cu)/n(63Cu) # 0.446 17 (u = 0.000 09, U_95 = 0.000 18) #
# Isotopic abundance, x(63Cu) # 0.691 48 (u = 0.000 045, U_95 = 0.000 09) #
# Isotopic abundance, x(65Cu) # 0.308 52 (u = 0.000 045, U_95 = 0.000 09) #
#
#####

### Isotopic composition of copper in NIST SRM976 #####
### Derived from the expression: delta(HICU-1 vs SRM976) = R(HICU-1)/RSRM976 - 1

R976 = rnorm(1e4, 2.2413, 0.0009/2) / (1 + rnorm(1e4, -0.04, 0.03/2)/1000)

round(c(mean(R976), 2*sd(R976)), 4)
# 2.2414 +/- 0.0009

### END # 27 Jun 2023

```
